# Supplementary material for: Biochemical profile in mixed martial arts athletes
Source: PeerJ. 2022 Jan 11;10:e12708. doi: 10.7717/peerj.12708 (PMC8759358; doi:10.7717/peerj.12708)
Supplement: Supplemental Information 1 [file peerj-10-12708-s001.xlsx]

## Sheet: biochemistry
No athlete	Seria I-K	Seria II-K	Seria III-K	Seria IV-K	Seria V-K	Seria I-T	Seria II-T	Seria III-T	Seria IV-T	Seria V-T	Seria I-T/C	Seria II-T/C	Seria III-T/C	Seria IV-T/C	Seria V-T/C	Seria I-K.M	Seria II-K.M	Seria III-K.M	Seria IV-K.M	Seria V-K.M	Seria I-CK	Seria II-CK	Seria III-CK	Seria IV-CK	Seria V-CK	Seria I-M	Seria II-M	Seria III-M	Seria IV-M	Seria V-M	Seria I-IL	Seria II-IL	Seria III-IL	Seria IV-IL	Seria V-IL	Seria I-TNF	Seria II-TNF	Seria III-TNF	Seria IV-TNF	Seria V-TNF	Seria I-plasma volume	Seria II	Seria III	Seria IV	Seria V	I-II	II-III	III-IV	III-V
1	188.41	323.5	210.1	263.19	199.9	5.87	6.96	7.08	6.1	7.77	3.11555	2.15147	3.36982	2.31772	3.88694	410	430	382	400	319	101	588.9	112	715	1155	23	27	20	155.8	40	0.91	3.44	0.77	7.86	3.81	2.2	2.3	2	2.6	3.8	70.2	70.56	73.65	80.95	70.7	-0.510204	-12.8351	-9.01791	4.17256
2	154.07	254	191	334.8	225.8	5.4	6.17	6.79	5.88	6.34	3.5049	2.42913	3.55497	1.75627	2.80779	284	368	332	402	271	123	546	156	546	871	15	87.2	16	98.9	31	1.93	5.77	2.1	7.84	2.77	2.9	3	2.7	3.4	3.6	66.9	75.4	73.1	78.1	65.9	-11.2732	-3.45711	-6.40205	10.9256
3	148.88	222.4	169.59	267	298.3	4.53	5.19	5.7	5.48	5.22	3.04272	2.33363	3.36105	2.05243	1.74992	283	301	290	321	292	98	419	98	536	879	22	28	22	256.8	41	0.87	3.13	0.68	7.44	4.92	3.3	3.5	3.1	3.3	5.5	73.7	71.9	74.9	83.9	70.7	2.50348	-14.3027	-10.7271	5.94059
4	191.39	231.04	186.96	259.2	111.8	4.58	4.99	5.29	5.3	4.97	2.39302	2.1598	2.82948	2.04475	4.44544	280	302	250	298	283	76	502	141	610	924	17	55.8	20	67.9	36	1.11	4.83	1.47	5.6	4.77	2.5	2.6	2.1	3	3.3	65.8	67.7	71.1	79.4	66.9	-2.8065	-14.7355	-10.4534	6.27803
5	197.45	244.12	199.99	263.64	200.8	5.55	5.99	6	5.28	5.32	2.81084	2.45371	3.00015	2.00273	2.6494	300	320	279	296	292	79	379	134	518	877	17	22	21	148.7	32	1.99	2.54	2.13	7.89	2.05	2.4	2.6	2	3.1	4.5	63.7	69.1	67.9	91.7	60.5	-7.81476	-24.6456	-25.9542	12.2314
6	213.53	243.68	203.19	248.12	267	5.17	5.48	5.7	4.64	5.45	2.42121	2.24885	2.80526	1.87006	2.0412	271	298	278	348	309	118	402	136	651	899	15	26	18	188.9	33	1.6	3.42	2.21	6.1	2.46	3.1	3.2	2.1	3.1	4.3	71.7	73.2	79.9	91.8	72.4	-2.04918	-20.2614	-12.963	10.3591
7	210.86	279.6	225.17	287.58	233.8	4.85	5.72	5.79	5.46	5.58	2.3001	2.04578	2.57139	1.8986	2.38666	300	338	298	330	249	167	669	119	799	1001	16	30	20	100.3	42	0.98	3.94	1.86	6.89	3.11	2.1	2.7	2.1	3.1	3.4	66.8	64.9	67.1	79.1	70.5	2.92758	-17.952	-15.1707	-4.8227
8	197.29	216.14	215.45	289	200.7	5.52	5.95	5.59	5	6.98	2.79791	2.75285	2.59457	1.7301	3.47783	342	324	319	377	394	121	456	147	610	989	14	33.5	15	76.9	19.6	1.21	6.77	1.99	5.86	3.27	2.5	2.5	2	2.5	4.1	70.3	72.8	76.1	83.2	73.1	-3.43407	-12.5	-8.53365	4.10397
9	196.96	216.08	199.54	250.11	177.3	4.98	4.98	5.11	5.04	5.5	2.52843	2.3047	2.56089	2.01511	3.10209	280	311	290	325	272.2	67	342	123	577	911	15	44.7	17	77.4	28.2	1.87	2.71	2.32	8.76	2.71	2.1	2.5	2.2	3.6	3.9	66.2	58.1	69.2	77.9	69.7	13.9415	-25.4172	-11.1682	-0.71736
10	98.85	331.87	112.9	318.7	219.6	3.9	4.6	5.1	4.8	5.4	3.94537	1.38608	4.51727	1.50612	2.45902	297.8	345.8	300.1	400.1	322.8	89.8	488.9	135.8	678.9	886.9	10.7	44.9	22.8	126.8	55.9	2.26	4.87	2.33	5.87	1.88	1.99	2.22	1.88	2.11	3.22	71.8	76.2	77.9	87.9	71.9	-5.77428	-13.3106	-11.3766	8.34492
11	126.87	275.99	139.7	331.99	188.9	4.1	4.6	4.9	4.6	5.6	3.23165	1.66673	3.50752	1.38558	2.96453	324.8	411	299.4	476.1	343.8	113.6	325.7	98.8	476.9	568.9	15.9	54.9	14.9	100.4	19.7	1.99	2.87	1.86	4.86	2.03	2.43	2.54	2.02	1.99	4.54	76.3	76	76.9	86.8	72.8	0.394737	-12.4424	-11.4055	5.63187
12	99.95	171.9	103.7	228.5	177.3	5.2	5.4	5.8	5.2	5.8	5.2026	3.14136	5.59306	2.27571	3.27129	235.7	301.6	256.8	388.9	288.1	124.7	765.8	76.8	577.8	764.1	11.7	55.2	13.8	67.9	22.8	2.09	3.01	0.98	3.99	2.33	1.87	2.01	2.01	2.33	2.98	69.8	70.9	70.3	76.9	66.9	-1.55148	-7.80234	-8.58257	5.08221
x	168.709	250.86	179.774	278.486	208.433	4.97083	5.5025	5.7375	5.23167	5.8275	3.10786	2.25617	3.35545	1.9046	2.93684	300.692	337.533	297.858	363.508	302.992	106.508	490.358	123.117	607.967	893.825	16.025	42.4333	18.375	122.225	33.4333	1.5675	3.94167	1.725	6.58	3.00917	2.44917	2.63917	2.18417	2.84417	3.92833	69.4333	70.5633	73.1708	83.1375	69.3333	-1.2872	-14.9718	-11.8129	5.62752
	Seria I-II	Seria II-III	Seira III-IV	Seria III-V		Seria I-II	Seria II-III	Seira III-IV	Seria III-V		Seria I-II	Seria II-III	Seira III-IV	Seria III-V		Seria I-II	Seria II-III	Seira III-IV	Seria III-V		Seria I-II	Seria II-III	Seira III-IV	Seria III-V		Seria I-II	Seria II-III	Seira III-IV	Seria III-V		Seria I-II	Seria II-III	Seira III-IV	Seria III-V		0.294884	0.00879039	0.0015314			3.66118	5.19025	4.1153	5.32409	3.68149	6.30663	6.35235	4.99682	4.82583
	0.000144075	0.000556141	1.67006e-06	0.123113		0.0578598	0.403353	0.0393131	0.76798		0.00473464	0.00105694	2.41509e-05	0.233364		0.0518495	0.0236267	0.00172212	0.736417		1.91143e-09	3.8042e-09	1.34694e-14								9.03787e-06															2.58136e-05
	Cortisol					Testosterone					T/C					Uric acid					Creatine kinase					Myoglobin					Interleukin 6
Series I - Initial Evaluation
Series II - The markings after a 12-week training period
Series III - Determinations after 2 weeks of recovery, pre-fight condition
Series IV - Determinations 12 hours after the bout
Series V - Determination 48 hours after the fight

## Sheet: somatics
No athlete	BM-I series	BH	LBM	FM	%F	BM-II series	BH	LBM	FM	%F
1	78.7	176	66.1	12.6	16.0102	75	176	64.8	10.2	13.6
2	60.5	165	53.2	7.3	12.0661	58.1	165	52.1	6	10.327
3	88.7	193	78.8	9.9	11.1612	85.9	193	78.8	7.1	8.26542
4	76.9	181	66.1	10.8	14.0442	72.1	181	64.1	8	11.0957
5	74.1	168	63.7	10.4	14.0351	72.3	168	63.2	9.1	12.5864
6	70.2	179	60.6	9.6	13.6752	69.1	179	61.1	8	11.5774
7	90.5	183	79	11.5	12.7072	88.4	183	79.3	9.1	10.2941
8	90.3	178	79.1	11.2	12.4031	88.2	178	79.2	9	10.2041
9	87.9	183	76.1	11.8	13.4243	85	183	75.9	9.1	10.7059
10	77.5	177	68.6	8.9	11.4839	73.3	177	65.6	7.7	10.5048
11	81.3	182	72.1	9.2	11.3161	77.8	182	69.9	7.9	10.1542
12	76.9	175	66.8	10.1	13.1339	73.2	175	63.6	9.6	13.1148
x	79.4583	178.333	69.1833	10.275	12.955	76.5333	178.333	68.1333	8.4	11.0358
sd	8.99934	7.27803	8.13397	1.44293	1.40395	9.01759	7.27803	8.57908	1.16853	1.4828
